# Supplementary material
Source: publisher figshare collection journal article supplement (https://acs.figshare.com/ndownloader/files/5124289)
Supplement: Supplementary file 1 [file 5124289]

## Supporting Information

### ***meso*-Alkyl Substituted *meso-meso* Linked Diporphyrins and *meso*-Alkyl Substituted *meso-meso*, $\beta$ - $\beta$ , $\beta$ - $\beta$ Triply Linked Diporphyrins**

*Satoru Hiroto and Atsuhiro Osuka\**

Department of Chemistry, Graduate School of Science, Kyoto University, and CREST (Core Research for Evolutional Science and Technology) of Japan Science and Technology Agency (JST), Sakyo-ku, Kyoto 606-8502, Japan

#### **Table of Contents**

S1-S7 General Experimental Details

S8-S16 Supporting Figures

#### **General**

All reagents and solvents were of the commercial reagent grade and used without further purification except where noted. Dry toluene was obtained by distillation over CaH<sub>2</sub>. Preparative separations were performed by silica gel gravity column chromatography (Wako gel C-400) and size exclusion gel permeation chromatography (Bio-Red Bio-Beads S-X1, packed with CHCl<sub>3</sub> or THF in a 4 x 100 cm gravity flow column).

#### **5-(4-Methoxycarbonylbutyl)dipyrromethane. (DM3)**

A mixture of methyl 6-oxohexanoate (2.58 g, 17.9 mmol) and pyrrole (50 mL) was degassed by bubbling with argon for 5 min, and then trifluoroacetic acid (0.134 mL, 1.81 mmol) was added. The reaction mixture was stirred for 20 min at room temperature. After the reaction was quenched with addition of a 0.1 M NaOH aqueous solution, the resulting mixture was diluted with ethyl acetate and washed with water twice. After the organic layer was dried over anhydrous Na<sub>2</sub>SO<sub>4</sub>, the solvent was removed under reduced pressure, and the unreacted pyrrole was removed by vacuum distillation. The residue was purified by silica-gel column chromatography with hexane:ethyl acetate = 4:1 solution as an eluent. Recrystallization from dichloromethane/hexane gave a colorless solid in 52% (2.48g, 9.52 mmol) yield. <sup>1</sup>H NMR (CDCl<sub>3</sub>)  $\delta$  1.35 (m, 2H), 1.66 (m, 2H), 1.97 (m, 2H), 2.28 (m, 2H), 3.65 (s, 3H, OCH<sub>3</sub>), 4.00 (t,  $J$  = 7.8 Hz, 1H), 6.05 (m, 2H), 6.14 (m, 2H), and 7.85 ppm (br, 2H). ESI HRMS obsd  $m/z$  261.1591 ([M+H]<sup>+</sup>), calcd for C<sub>15</sub>H<sub>21</sub>O<sub>2</sub>N<sub>2</sub><sup>+</sup> 261.1598; mp 90 - 91 °C.

### 5,15-Dihexylporphyrin. (1)

A solution of *meso*-free dipyrromethane (**DM1**) (1.07 g, 7.43 mmol) and heptanal (0.843 g, 7.38 mmol) in CH<sub>2</sub>Cl<sub>2</sub> (1.4 L) was degassed by argon for 5 min in a 2 L round-bottom flask, to which was added trifluoroacetic acid (0.055 mL, 0.743 mmol). The mixture was stirred overnight at room temperature and then DDQ (2.54 g, 11.2 mmol) was added. The mixture was stirred for additional 1 h, and then quenched with triethylamine and filtered through a short alumina column. The solvent was removed and purification by silica-gel column chromatography with CH<sub>2</sub>Cl<sub>2</sub> gave 5,15-dihexyl substituted porphyrin in 20% yield (351 mg, 0.734 mmol). <sup>1</sup>H NMR (CDCl<sub>3</sub>)  $\delta$  -2.92 (br s, 2H), 0.95 (t,  $J$  = 7.7 Hz, 6H), 1.42 (m,  $J$  = 7.3 Hz, 4H), 1.54 (m,  $J$  = 7.8 Hz, 4H), 1.83 (m,  $J$  = 7.3 Hz, 4H), 2.57 (m,  $J$  = 7.8 Hz, 4H), 5.01 (m,  $J$  = 8.2 Hz, 4H), 9.43 (d,  $J$  = 4.6 Hz, 4H), 9.59 (d,  $J$  = 4.6 Hz, 4H), and 10.2

ppm (s, 2H); UV-vis ( $\text{CHCl}_3$ )  $\lambda_{\text{max}}$  = 403, 503, 535, and 577 nm; ESI HRMS obsd  $m/z$  479.3172 ( $[\text{M}+\text{H}]^+$ ), calcd for  $\text{C}_{32}\text{H}_{38}\text{N}_4^+$  479.3168; mp >300 °C decomp.

### **AgPF<sub>6</sub>-promoted oxidation of zinc(II) 5,15-dihexylporphyrin**

A solution of **Zn-1** (49.8 mg, 91.9  $\mu\text{mol}$ ) in  $\text{CHCl}_3$  was shielded from light and cooled to 0°C. A solution of  $\text{AgPF}_6$  (0.36 mL, 0.12 M solution in acetonitrile) was added and the mixture was stirred. After 2 h, the reaction was quenched with water. The organic phase was washed with water and dried over anhydrous  $\text{Na}_2\text{SO}_4$ . The solvent was removed by a rotary evaporator. The residue was dissolved in  $\text{CHCl}_3$  and treated with a solution of  $\text{Zn}(\text{OAc})_2 \cdot 2\text{H}_2\text{O}$  in methanol, and the mixture was refluxed for 2 h. The reaction mixture was quenched with saturated  $\text{NaHCO}_3(\text{aq})$ , and extracted with  $\text{CHCl}_3$ . The combined organic extract was washed with water and dried over anhydrous  $\text{Na}_2\text{SO}_4$ . The solvent was removed by a rotary evaporator. Size-exclusion column chromatography (SEC) with  $\text{CHCl}_3$  as an eluent gave recovered monomer (18.7 mg, 42%), dimer (2.6 mg, 6%) and other oligomers (<1% respectively). The diporphyrin fraction was found to be a 4.5:1 mixture of *meso-meso* linked diporphyrin **2** and *meso- $\beta$*  linked diporphyrin **3** by the  $^1\text{H}$ -NMR (Supporting Figure 3) and FAB-MS measurements (Figure 4). FAB-MS (free-base) obsd  $m/z$  954.82, calcd for  $\text{C}_{64}\text{H}_{74}\text{N}_8$  954.60.

### **5,10,15-Trihexyl zinc(II)-porphyrin. (Zn-4)**

A solution of *meso*-free dipyrromethane (**DM1**) (1.18 g, 8.08 mmol), *meso*-hexyl dipyrromethane (**DM2**) (1.89 g, 8.18 mmol) and heptanal (2.24 mL, 16.4 mmol) in dichloromethane (1.6 L) was degassed by argon for 5 min in a 2 L round- flask, to which was added  $\text{BF}_3 \cdot \text{OEt}_2$  (0.66 mL, 2.5 M

solution in CH<sub>2</sub>Cl<sub>2</sub>). The mixture was stirred for 15 min at room temperature and was added DDQ (5.58 g, 24.5 mmol). After an additional stirring for 1 h the reaction was quenched with triethylamine and filtered through a short alumina column. The solvent was removed by a rotary evaporator and the residue was purified by silica-gel column chromatography with ethyl acetate:hexane = 1:10 solution as an eluent gave 5,10,15-trihexylporphyrin **4** as the second fraction. Then, the product was dissolved in CHCl<sub>3</sub>, and a saturated solution of Zn(OAc)<sub>2</sub>·2H<sub>2</sub>O in methanol was added to the solution. The resulting mixture was refluxed for 2 h. After the complete metalation was confirmed by MALDI TOF-MS and UV analyses, the mixture was poured into water and extracted with CHCl<sub>3</sub> twice. The organic layer was dried over anhydrous Na<sub>2</sub>SO<sub>4</sub> and evaporated. Recrystallization with CHCl<sub>3</sub>/methanol afforded **Zn-4** as purple solids in 8% yield (418 mg, 0.668 mmol). <sup>1</sup>H NMR (CDCl<sub>3</sub>) δ 0.98 (m, 9H), 1.43 (m, 6H), 1.54 (m, 6H), 1.83 (m, 6H), 2.46 (m, 6H), 4.69–4.75 (m, 6H), 9.06 (d, *J* = 4.6 Hz, 2H), 9.28–9.34 (m, 6H) and 9.62 ppm (s, 2H). UV-vis (CHCl<sub>3</sub>) λ<sub>max</sub>(ε) = 415 (365000) and 549 (13200) nm. ESI HRMS obsd *m/z* 659.2837 ([M + Cl]<sup>+</sup>), calcd for C<sub>38</sub>H<sub>50</sub>N<sub>4</sub>ZnCl 659.2864; mp >300 °C decomp.

***meso*-Hexyl *meso-meso* linked zinc(II)-diporphyrin (**5**).<sup>[1]</sup>**

A solution of **4** (188 mg, 0.298 mmol) in CHCl<sub>3</sub> (150 mL) with 0.5% *N,N*-dimethylacetamide was degassed by argon for 5 min, then AgPF<sub>6</sub> (2.98 mL, 0.12 M solution in acetonitrile) was added. The mixture was stirred for 1 h at room temperature, then quenched with water. The solution was extracted with CHCl<sub>3</sub> three times. The combined organic extract was washed with water and brine, and dried over anhydrous Na<sub>2</sub>SO<sub>4</sub>. SEC chromatography with CHCl<sub>3</sub> as an eluent afforded **5** in 70% yield (131 mg, 0.105 mmol). <sup>1</sup>H NMR (CDCl<sub>3</sub>) δ 0.88–1.02 (m, 18H), 1.36–1.61 (m, 24H), 1.82–1.94 (m, 12H), 2.57–2.65 (m, 12H), 4.92–5.07 (m, 12H), 8.08 (d, *J* = 4.6 Hz, 4H), 9.21 (d, *J* = 5.0 Hz, 4H), 9.61 (d, *J* = 4.6

Hz, 4H), and 9.65 ppm (d,  $J = 4.6$  Hz, 4H); UV-vis (THF)  $\lambda_{\text{max}}(\epsilon) = 421$  (186000), 458 (281000), 572 (41200), and 616 nm (17500); ESI HRMS obsd  $m/z$  1250.6211 ( $[M]^+$ ), calcd for  $C_{76}H_{94}N_8Zn_2^+$  1250.6158; mp  $>300^\circ\text{C}$  decomp.

***meso*-Hexyl *meso-meso*,  $\beta$ - $\beta$ ,  $\beta$ - $\beta$ , triply linked zinc(II)-diporphyrin (**6**).<sup>[2]</sup>**

A solution of **5** (29.7 mg, 23.8  $\mu\text{mol}$ ) in dry toluene (50 mL) was degassed by argon and warmed up to  $50^\circ\text{C}$ . Then DDQ (27.2 mg, 120  $\mu\text{mol}$ ) and  $\text{Sc}(\text{OTf})_3$  (79.5 mg, 160  $\mu\text{mol}$ ) were added and the resulting mixture was stirred at  $50^\circ\text{C}$ . After 12 h, the mixture was diluted with THF and filtered through a short neutral alumina. The elution was evaporated and the residue was dissolved in THF with pyridine. Separation by SEC chromatography with THF as an eluent and recrystallization from THF/methanol gave **6** (18.6 mg, 14.5  $\mu\text{mol}$ ) as light red solids in 61% yield.  $^1\text{H}$  NMR ( $\text{C}_5\text{D}_5\text{N}$ ):  $\delta$  0.80 (m, 18H), 1.23 (m, 12H), 1.49 (m, 24H), 2.11 (m, 12H), 3.88–4.00 (m, 6H), 8.37 (s, 4H), 8.55 (d,  $J = 5.0$  Hz, 4H), and 8.60 ppm (d,  $J = 4.6$  Hz, 4H). UV-vis (THF)  $\lambda_{\text{max}}(\epsilon) = 418$  (71600), 480 (41600), 556 (67000), 578 (67000), and 1127 nm (24800). ESI HRMS obsd  $m/z$  1246.5855 ( $[M]^+$ ), calcd for  $C_{76}H_{90}N_8Zn_2^+$  1246.5845; mp:  $>240^\circ\text{C}$  decomp.

**5,10,15-Tris(4-methoxycarbonylbutyl) zinc(II)-porphyrin (Zn-7).**

A solution of *meso*-free dipyrromethane (1.10 g, 7.53 mmol), **DM3** (1.96 g, 7.53 mmol), methyl 6-oxohexanoate (2.16 g, 15.0 mmol) in dichloromethane (1.6 L) was degassed by argon for 5 min in a 2 L round- flask, to which was added  $\text{BF}_3 \cdot \text{OEt}_2$  (0.60 mL, 2.5 M solution in  $\text{CH}_2\text{Cl}_2$ ). The mixture was stirred for 15 min at room temperature and was added DDQ (5.13 g, 22.6 mmol). The mixture was

stirred for an additional 1 h and then quenched with triethylamine and filtered through a short alumina column. Purification by silica-gel column chromatography using dichloromethane:ethyl acetate = 10:1 as an eluent afforded purple solid as the second fraction. Then, the crude product was dissolved in  $\text{CHCl}_3$ , and a saturated solution of  $\text{Zn}(\text{OAc})_2 \cdot 2\text{H}_2\text{O}$  in methanol was added to the solution. The resulting mixture was refluxed for 2 h. After the complete metalation was confirmed by MALDI TOF-MS and UV analyses, the mixture was poured into water and extracted with  $\text{CHCl}_3$  twice. The organic layer was dried over anhydrous  $\text{Na}_2\text{SO}_4$  and evaporated. Recrystallization with  $\text{CHCl}_3$ /hexane afforded **Zn-7** as purple solids in 6% yield (342 mg, 0.478 mmol).  $^1\text{H}$  NMR ( $\text{CDCl}_3$ )  $\delta$  2.17 (m, 6H), 2.53 (m, 12H), 3.69 (m, 15H), 4.96 (m, 6H), 9.28 (d,  $J$  = 4.6 Hz, 2H), 9.52 (m,  $J$  = 4.6 Hz, 6H), and 9.88 ppm (s, 1H); UV-vis ( $\text{CHCl}_3$ )  $\lambda_{\text{max}}(\epsilon)$  = 416 (276000), 549 (11600) and 591 (4500) nm; ESI HRMS obsd  $m/z$  737.2274 ( $[\text{M} + \text{Na}]^+$ ), calcd for  $\text{C}_{38}\text{H}_{42}\text{O}_6\text{N}_4\text{ZnNa}^+$  737.2288; mp >300 °C decomp.

***meso*-(4-Methoxycarbonylbutyl) *meso-meso* linked zinc(II)-diporphyrin (8).**

A solution of **7** (100 mg, 140  $\mu\text{mol}$ ) and  $\text{AgPF}_6$  (1.40 mL, 0.120 M in acetonitrile solution) was stirred for 30 min under argon atmosphere. Purification by SEC chromatography gave **8** in 61% yield (61.0 mg, 42.6  $\mu\text{mol}$ ).  $^1\text{H}$  NMR ( $\text{CDCl}_3$ ):  $\delta$  2.11–2.23 (m, 12H), 2.43–2.65 (m, 24H), 3.58–3.71 (m, 18H), 4.93–5.07 (m, 12H), 8.08 (d,  $J$  = 4.6 Hz, 4H), 9.19 (d,  $J$  = 4.6 Hz, 4H), 9.57 (d,  $J$  = 4.6 Hz, 4H), and 9.61 ppm (d,  $J$  = 4.6 Hz, 4H); UV-vis ( $\text{CHCl}_3$ )  $\lambda_{\text{max}}(\epsilon)$  = 422 (194000), 456 (159000) and 564 (26000) nm; ESI HRMS obsd  $m/z$  1453.4455 ( $[\text{M} + \text{Na}]^+$ ), calcd for  $\text{C}_{76}\text{H}_{82}\text{N}_8\text{O}_{12}\text{Zn}_2\text{Na}^+$  1453.4508; mp >300 °C decomp.

***meso*-(4-(2-Ethylhexyloxy)carbonylbutyl) *meso-meso* linked zinc(II)-diporphyrin (9).**

A solution of **8** (60.0 mg, 41.9  $\mu\text{mol}$ ), 2-ethyl-1-hexanol (0.15 mL, 0.96 mmol), and a distannoxane catalyst (10.1 mg, 9.62  $\mu\text{mol}$ ) in toluene was refluxed under argon atmosphere for 5 days. After the mixture was cooled to room temperature, the solvent was removed under reduced pressure. The residue was dissolved to  $\text{CHCl}_3$  and purification by silica-gel column chromatography with  $\text{CHCl}_3$  gave **9** in 80 % yield as a purple solid. Without further purification, the product was used for the next reaction: FAB MS obsd  $m/z$  2018.98, calcd for  $\text{C}_{118}\text{H}_{166}\text{N}_8\text{O}_{12}\text{Zn}_2$  2018.12.

**meso-(4-(2-Ethylhexyloxy)carbonylbutyl) meso-meso,  $\beta$ - $\beta$ ,  $\beta$ - $\beta$ , triply linked zinc(II)-diporphyrin (10).**

This compound was subjected to the conditions similar to those of the compound **6**. A solution of **9** (40.0 mg, 19.8  $\mu\text{mol}$ ), DDQ (22.5 mg, 99.1  $\mu\text{mol}$ ) and  $\text{Sc}(\text{OTf})_3$  (68.4 mg, 139  $\mu\text{mol}$ ) were stirred for 12 h at 50  $^\circ\text{C}$ . Purification by silica-gel column chromatography with  $\text{CHCl}_3$  gave **10** as a red solid in 38% yield (15.1 mg, 7.49  $\mu\text{mol}$ ).  $^1\text{H}$  NMR ( $\text{C}_2\text{D}_2\text{Cl}_4$ ):  $\delta$  0.91–3.54 (m, 72H), 4.03–4.09 (m, 12H), 7.56 (br, 4H), 7.89 (br, 4H), and 7.93 ppm (br, 4H); UV-vis ( $\text{CH}_2\text{Cl}_2$ )  $\lambda_{\text{max}}(\epsilon) = 400$  (139000), 470 (65600), 543 (133000), 948 (21500), and 1059 nm (22600); ESI HRMS obsd  $m/z$  2016.0963 ( $[\text{M} + \text{H}]^+$ ), calcd for  $\text{C}_{118}\text{H}_{163}\text{N}_8\text{O}_{12}\text{Zn}_2^+$  2016.0969; mp  $>300$   $^\circ\text{C}$  decomp.

## References

- (1) Yoshida, N.; Aratani, N.; Osuka, A. *Chem. Commun.* **2000**, 197-198.
- (2) Tsuda, A.; Osuka, A. *Science* **2001**, 293, 79.

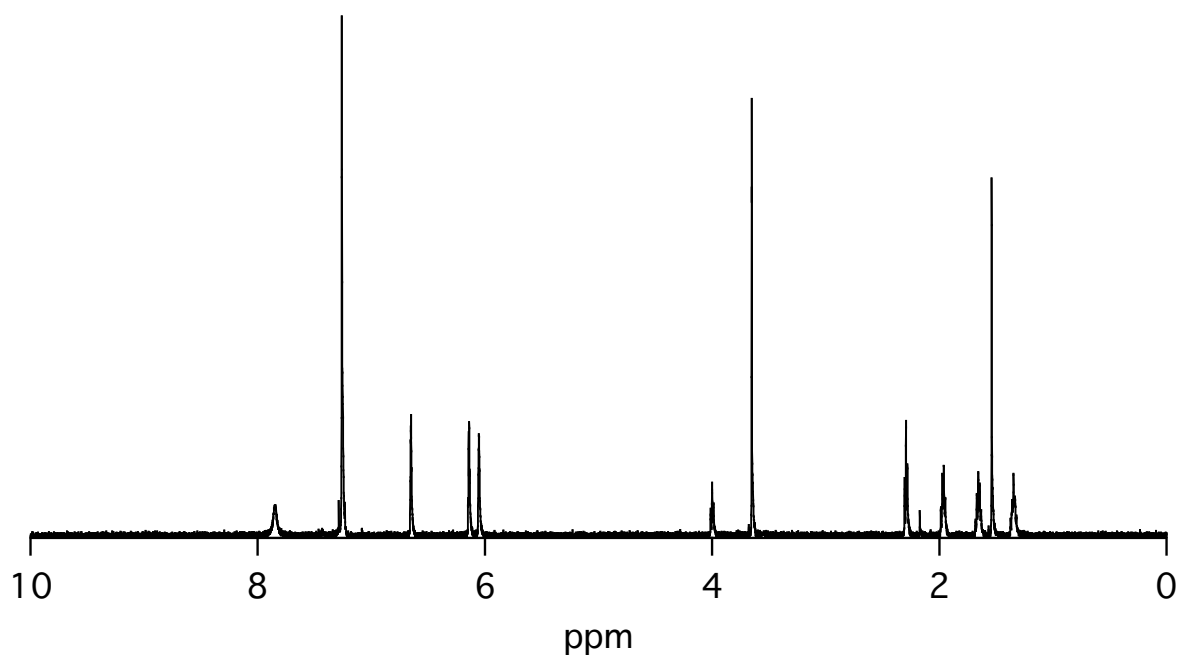

**Figure S1.**  $^1\text{H}$  NMR spectrum of **DM3** in  $\text{CDCl}_3$



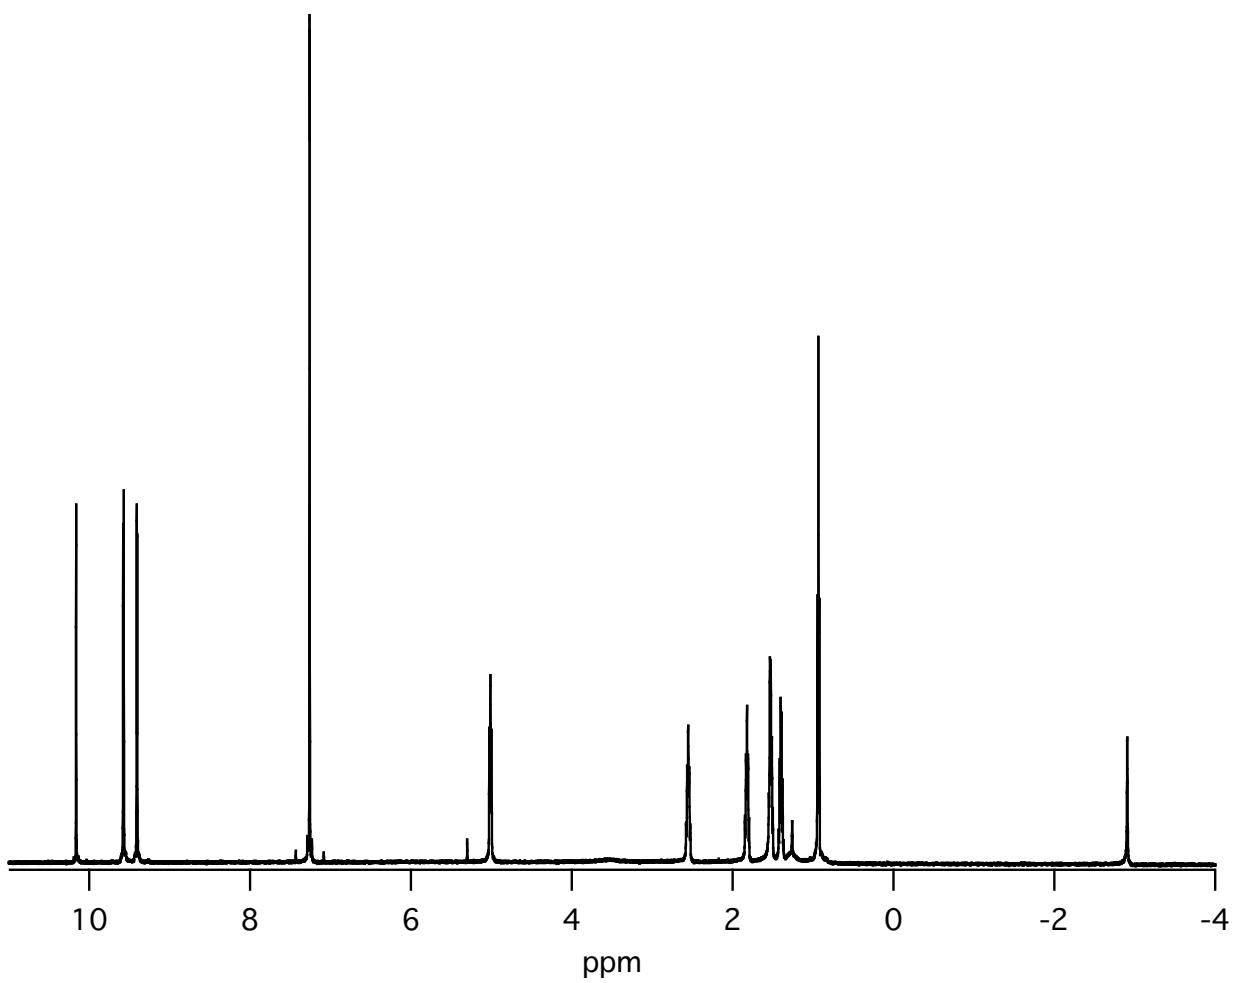

**Figure S2.**  $^1\text{H}$  NMR spectrum of **1** in  $\text{CDCl}_3$ .

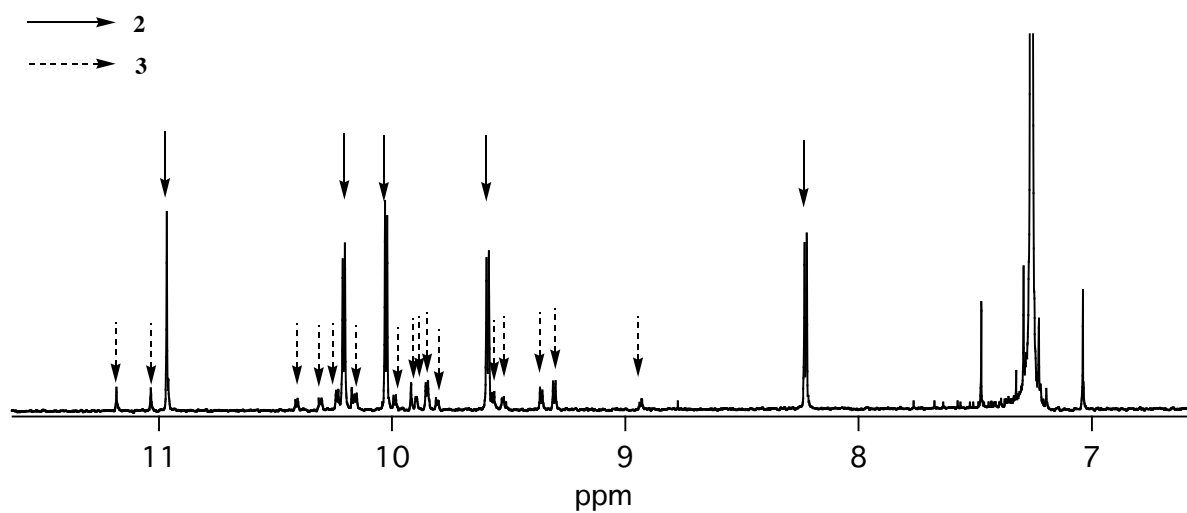

**Figure S3.**  $^1\text{H}$  NMR spectrum of the diporphyrin products (**2** and **3**).

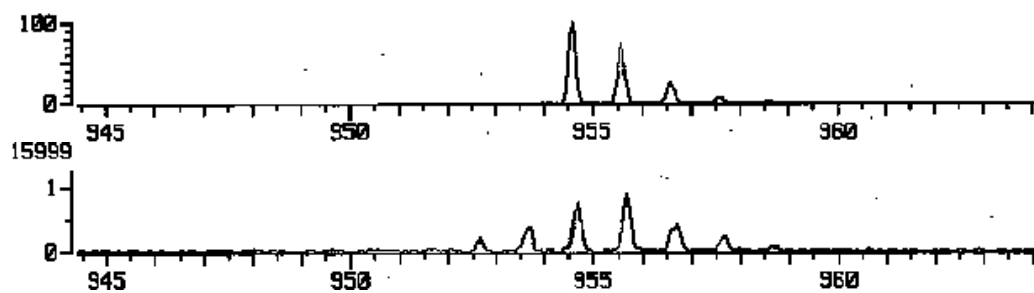

**Figure S4.** FAB-MS of the diporphyrin products (**2** and **3**).

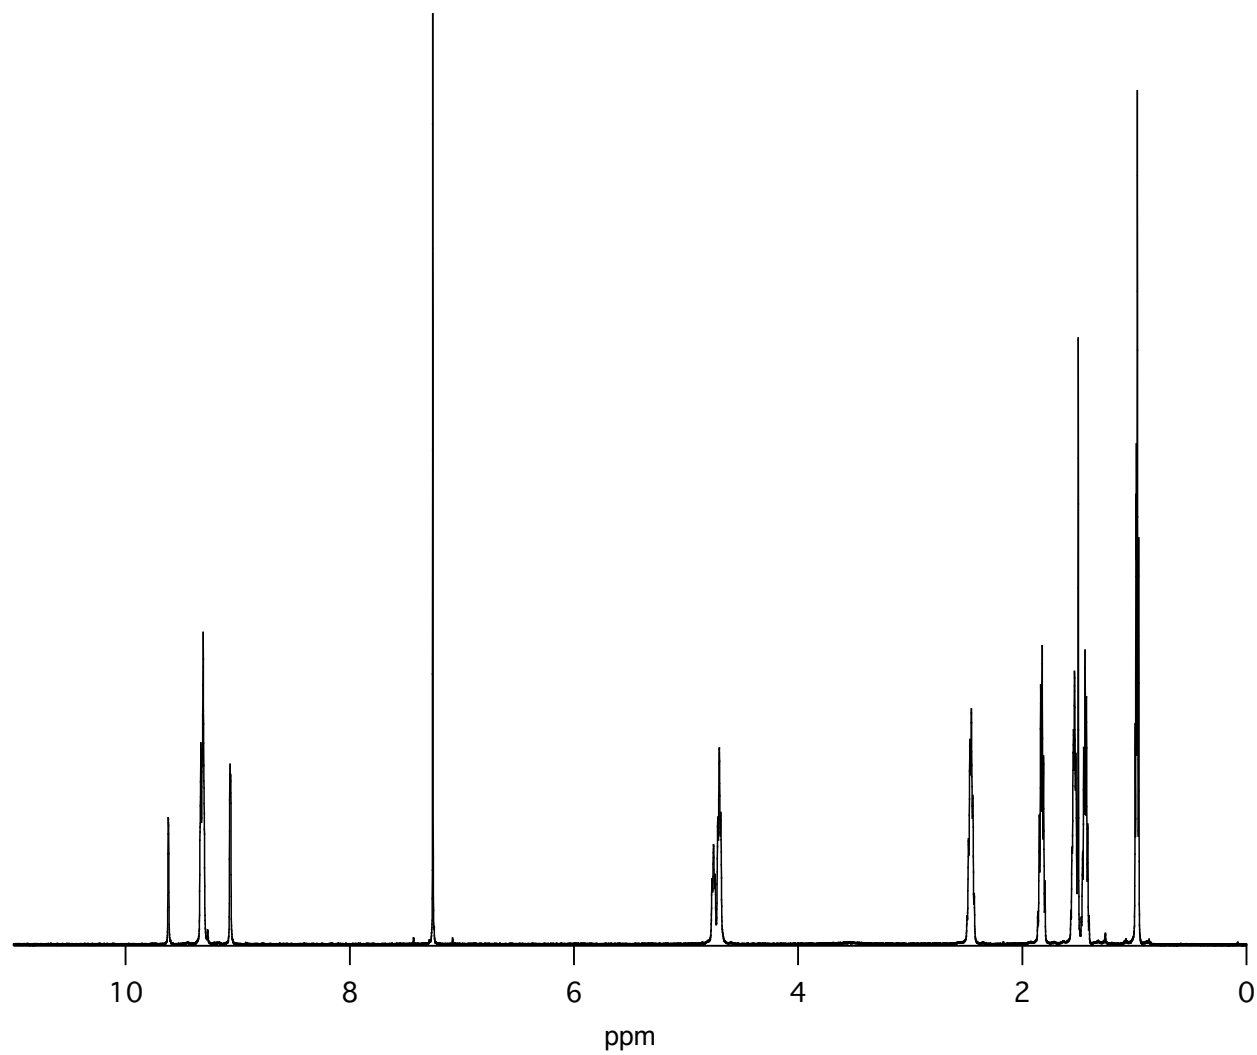

**Figure S5.**  $^1\text{H}$  NMR spectrum of **Zn-4** in  $\text{CDCl}_3$ .

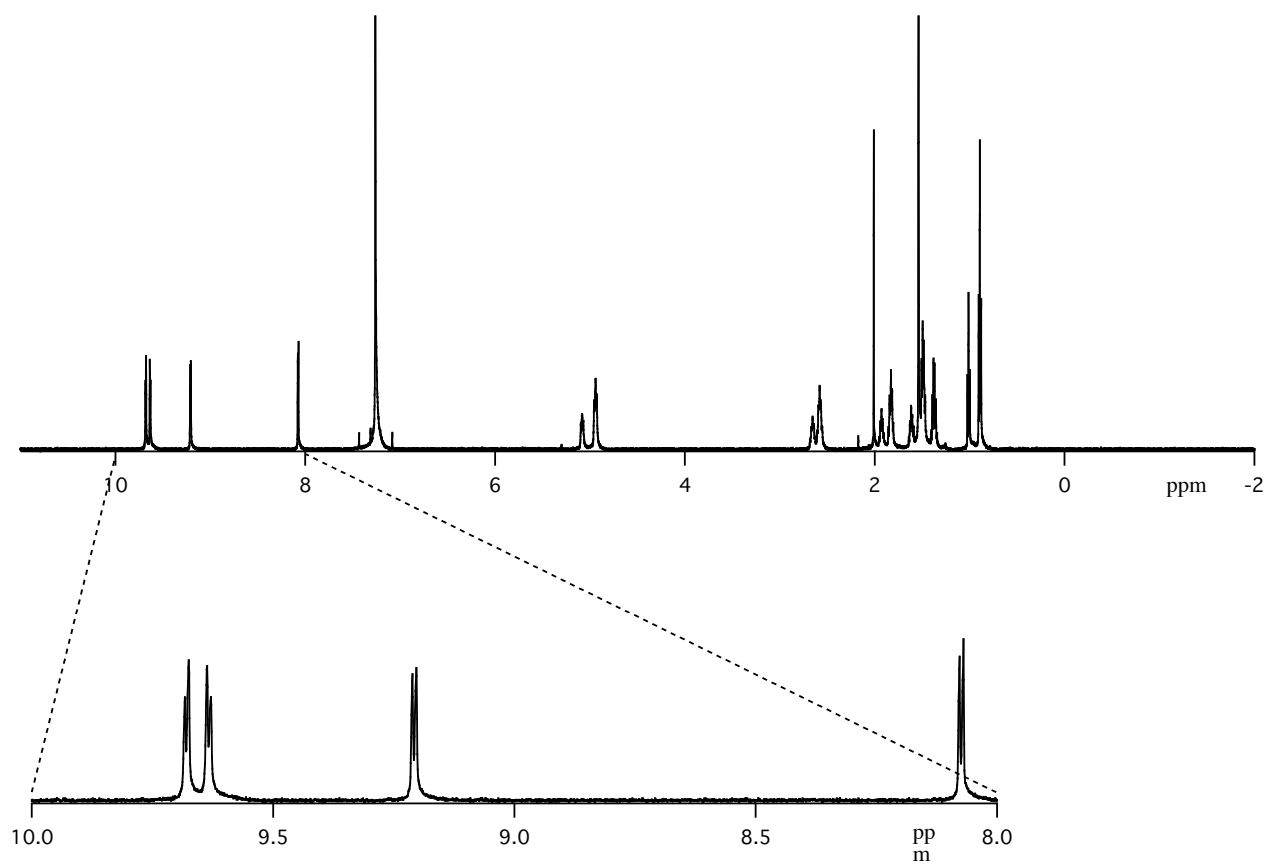

**Figure S6.**  $^1\text{H}$  NMR spectrum of **5** in  $\text{CDCl}_3$ .

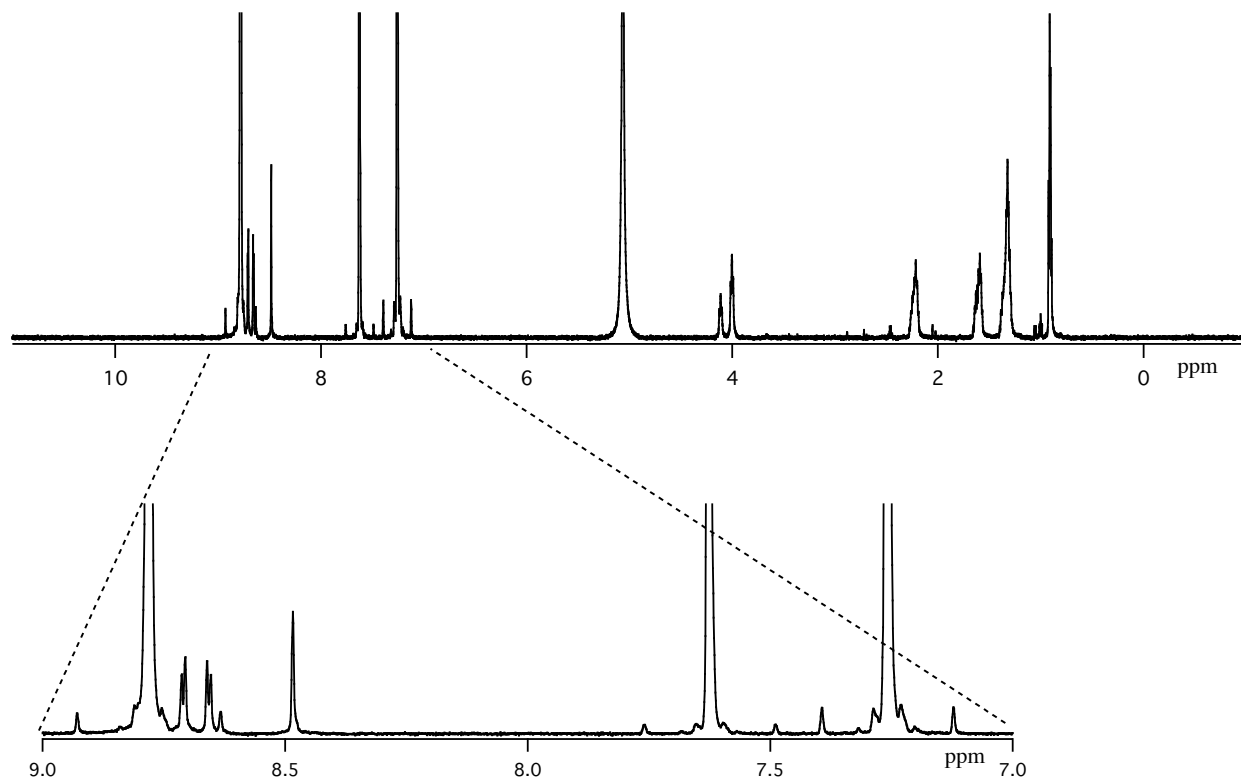

**Figure S7.**  $^1\text{H}$  NMR spectrum of **6** in  $\text{pyridine-}d_5$ .

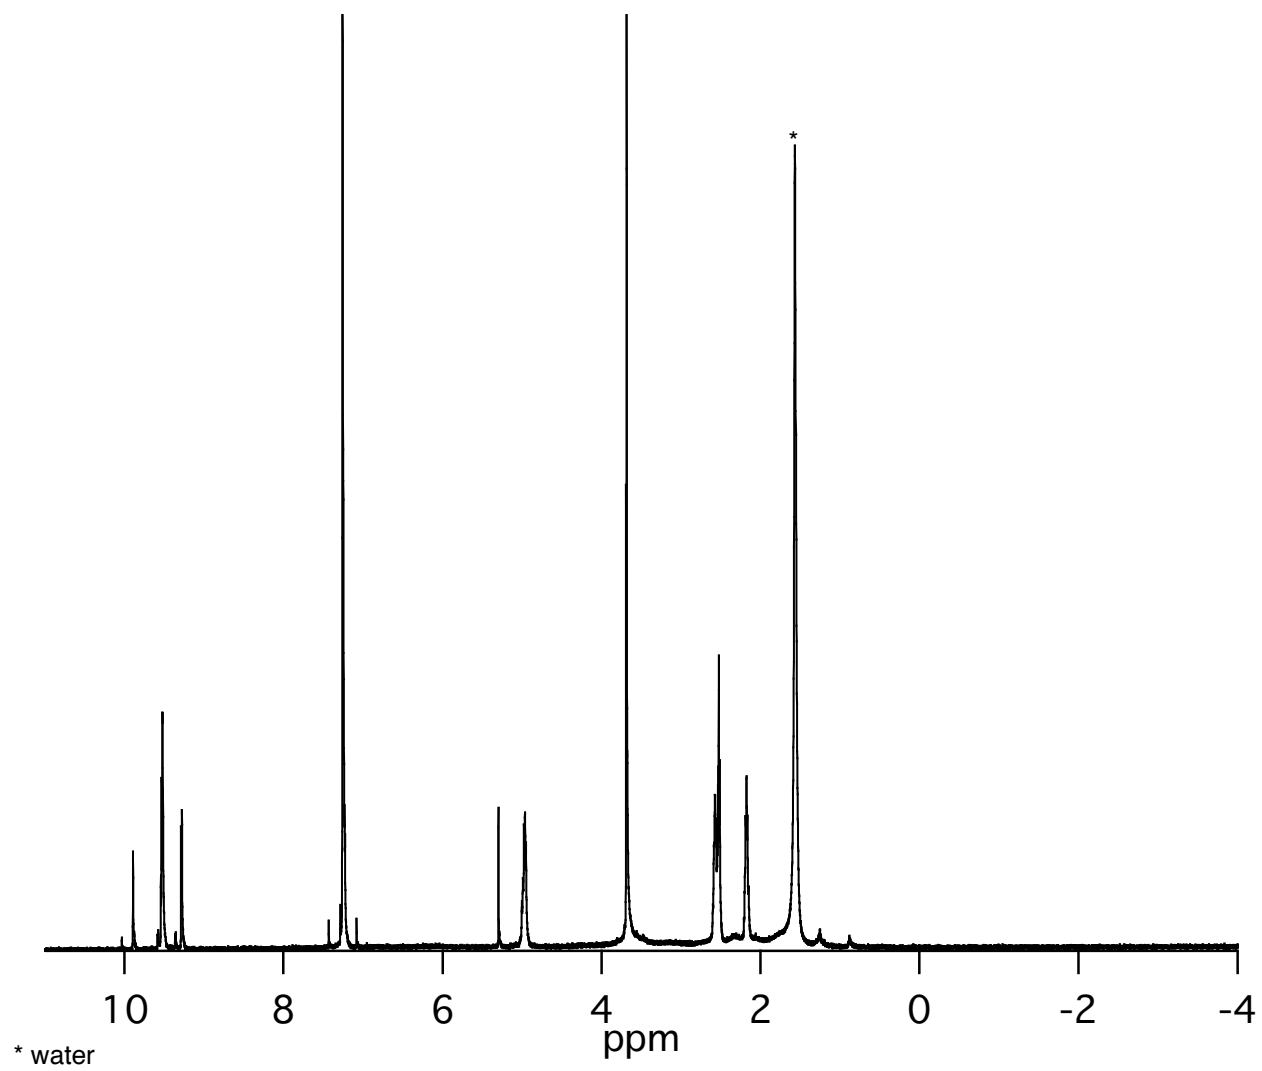

**Figure S8.**  $^1\text{H}$  NMR spectrum of **Zn-7** in  $\text{CDCl}_3$ .

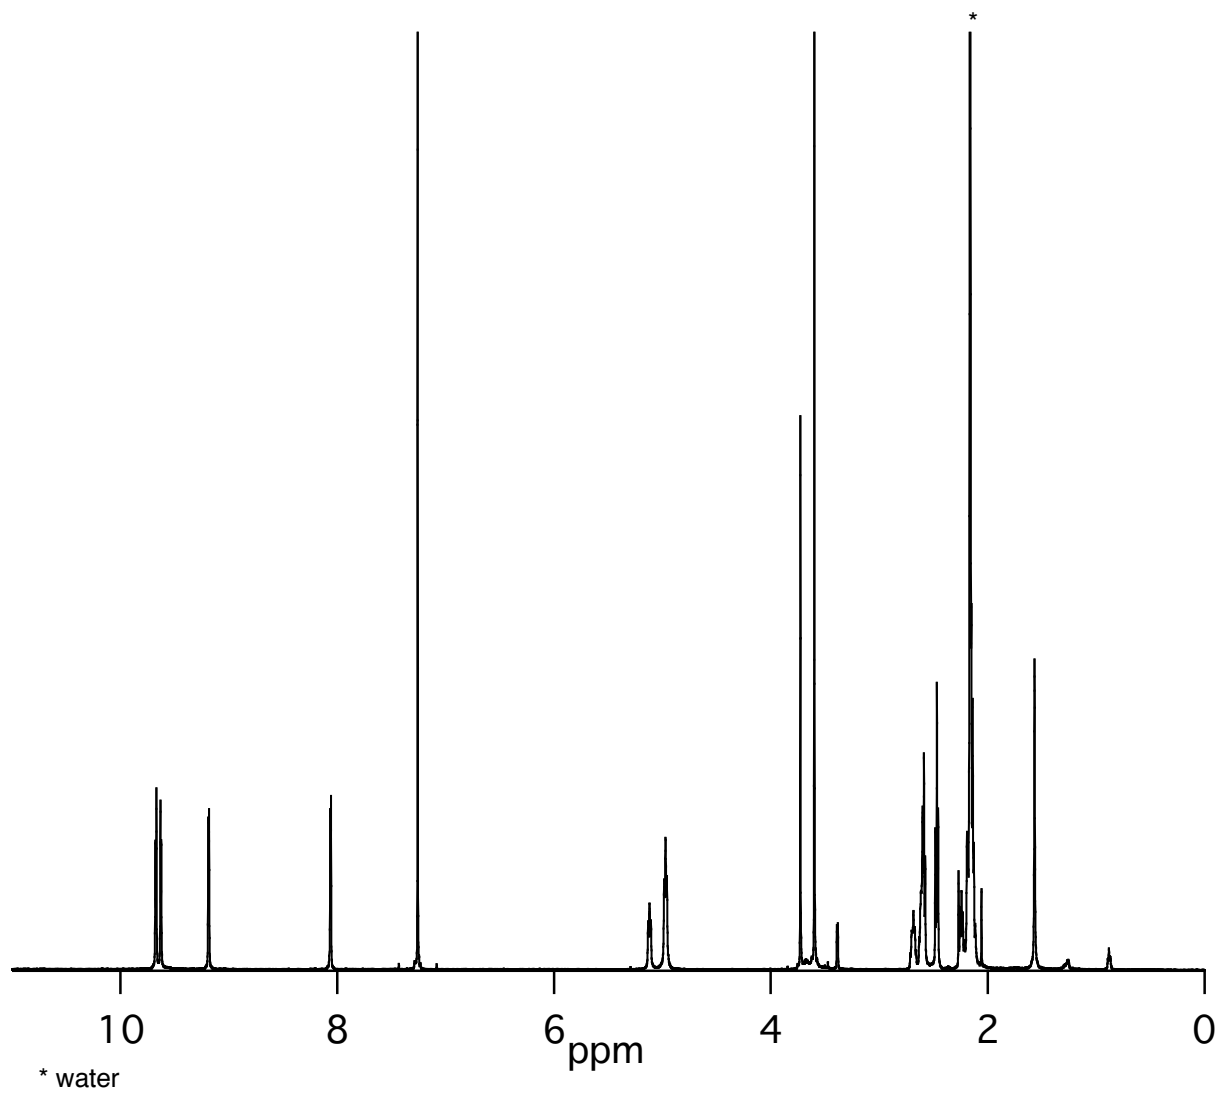

**Figure S9.**  $^1\text{H}$  NMR spectrum of **8** in  $\text{CDCl}_3$ .

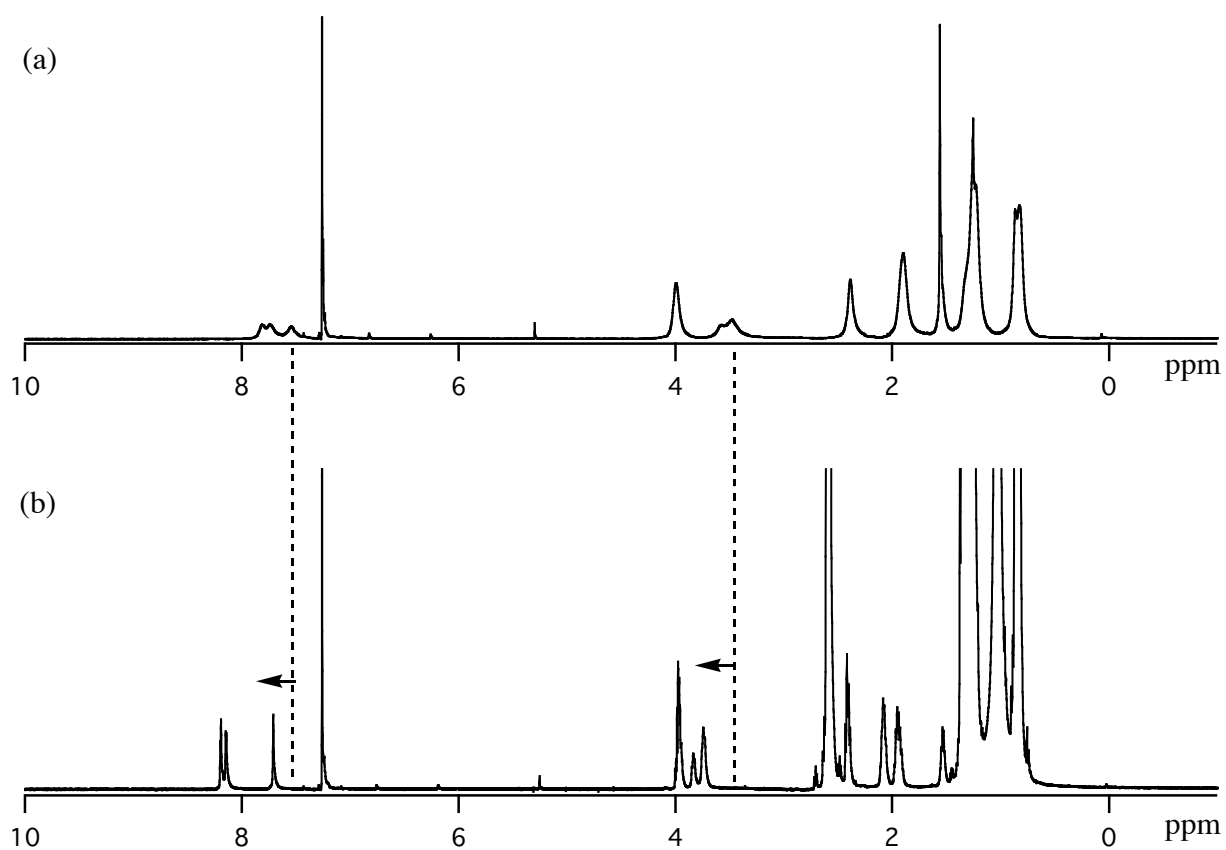

**Figure S10.**  $^1\text{H}$  NMR spectra of **10** (a) in  $\text{CDCl}_3$  and (b) in  $\text{CDCl}_3$  containing butylamine.
